# Supplementary material for: Spiritual issues of people living and dying with advanced heart failure in Kenya: a qualitative serial interview study
Source: PubMed Central journal article supplement — BMJ Glob Health. 2016 Nov 18;1(3):e000077. doi: 10.1136/bmjgh-2016-000077 (PMC5321358; doi:10.1136/bmjgh-2016-000077), 2016-11-18
Supplement: bmjgh-2016-000077supp.pdf [file bmjgh-2016-000077supp.pdf]

## Patients interview topic guide

| Main topic                         | Questions or prompts                                                                                                                                                               | Issues to be explored                                                                                     |
|------------------------------------|------------------------------------------------------------------------------------------------------------------------------------------------------------------------------------|-----------------------------------------------------------------------------------------------------------|
| History of illness                 |                                                                                                                                                                                    |                                                                                                           |
|                                    | Can you tell me about how your problem started? When did you notice there was something wrong? When were you told you had a problem? How did you cope? Did you go to see a doctor? | Patient's perceived diagnosis;<br>Main issues experienced<br>How patient copes with these issues          |
| Current issues                     |                                                                                                                                                                                    |                                                                                                           |
| Physical                           | What are your main problems?<br>Have you had any physical problems?<br>How do your physical problems affect your daily life?                                                       | Physical symptoms:<br>(breathlessness, fatigue, insomnia<br>ankle swelling etc)                           |
| Psychological                      | How do you feel about yourself? What do you worry about?                                                                                                                           | Psychological symptoms:<br>anxiety and depression                                                         |
| Social                             | Has your illness affected how you relate with family and friends?                                                                                                                  | Social support networks and isolation                                                                     |
| Spiritual                          | Have you thought why this is happening? What helps you cope? How is this affected by your illness? What is important to you in life? Do you think about the future?                | Beliefs and if they help in coping                                                                        |
| Experience and expectation of care |                                                                                                                                                                                    |                                                                                                           |
|                                    | What type of care are you receiving? Is this helpful?<br>Would you like to change the care you are receiving? What would you change about the care you receive?                    | Awareness of the type of care being received,<br>What do they expect from care and what would they change |
|                                    | How do you find talking to doctors/nurses? Do you get a chance to ask questions? Do you understand what they tell you?                                                             | Communication relationship with health professionals                                                      |

## Carers Interview topic guide

| Main topic                         | Questions or prompts                                                                                                                                                                          | Issues to be explored                                                                             |
|------------------------------------|-----------------------------------------------------------------------------------------------------------------------------------------------------------------------------------------------|---------------------------------------------------------------------------------------------------|
| Current issues                     |                                                                                                                                                                                               |                                                                                                   |
| Physical                           | <p>What were X's main problems?</p> <p>Had X had any physical problems?</p> <p>How did X's physical problem affect his/her daily life?</p>                                                    | Physical symptoms: (breathlessness, fatigue, insomnia, ankle swelling etc)                        |
| Psychological                      | <p>How do you think X felt about his or himself? What do you think X worried about?</p>                                                                                                       | Psychological symptoms: anxiety and depression                                                    |
| Social                             | <p>How did X's illness affect how he/she related with family and friends?</p>                                                                                                                 | Social support networks and isolation                                                             |
| Spiritual                          | <p>Do you think X thought why this was happening?</p> <p>What helped X cope? How did this affect their illness</p> <p>What do you think was important to X? Did X think about the future?</p> | Beliefs and if they help in coping                                                                |
| Experience and Expectation of care |                                                                                                                                                                                               |                                                                                                   |
|                                    | <p>What type of care was X receiving? Was it helpful? Would X like to change the care he/she was receiving? What would X change about the care he/she was receiving</p>                       | Awareness of the type of care received, What did they expect from care and what would they change |
|                                    | <p>How did X find talking to doctors/nurses? Did X get a chance to ask questions?</p> <p>What was X told about his/her illness? Did X understand what they were told?</p>                     | Patient's view of the care they received                                                          |
